# Supplementary material for: Determinants of overweight and/or obesity among school adolescents in Butajira Town, Southern Ethiopia. A case-control study
Source: PubMed Central journal article supplement (PMC9239474; doi:10.1371/journal.pone.0270628), 2022-06-28

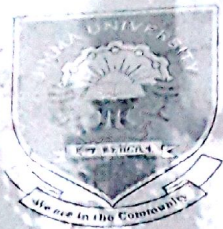

# JIMMA UNIVERSITY

የገንዘብ ትምህርት

ቁጥር  
Ref. No JHR/PSD/690/19  
ቀን  
Date 29/02/2019

Institutional Review Board (IRB)  
Institute of Health  
Jimma University  
Tel: +251471120945  
E-mail: [zeleke.mekonnen@ju.edu.et](mailto:zeleke.mekonnen@ju.edu.et)

To: Shemsu Kedir

Subject: Ethical approval of research protocol

The IRB of institute of health has reviewed your research project entitled:

**“Determinants of over-nutrition (overweight and obesity) among school adolescent students in Buitajira Town: A case control study design**

This is to notify that this research protocol as presented to the IRB meets the ethical and scientific standards outlined in national and international guidelines. Hence, we are pleased to inform you that your protocol is ethically cleared.

We strongly recommended that any significant deviation from the methodological details indicated in the approved protocol must be communicated to the IRB before they are implemented.

With regards!

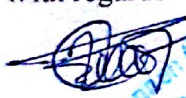  
Zeleke Mekonnen (PhD)  
Associate Professor, Health  
Research and Postgraduate  
Director

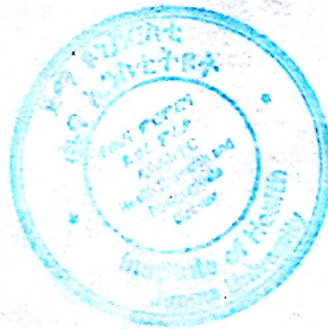

Supplement: pone.0270628.s005.pdf [file pone.0270628.s005.pdf]
